# Supplementary material for: Segmental and Tandem Duplications Driving the Recent NBS-LRR Gene Expansion in the Asparagus Genome
Source: MDPI journal article supplement (doi:10.3390/genes9120568), 2018-11-23
Supplement: s1 [file s1]

# **Segmental and tandem duplications driving the recent NBS-LRR gene expansion in the asparagus genome**

**Die, Castro, Millán, Gil**

**Supplementary Files**

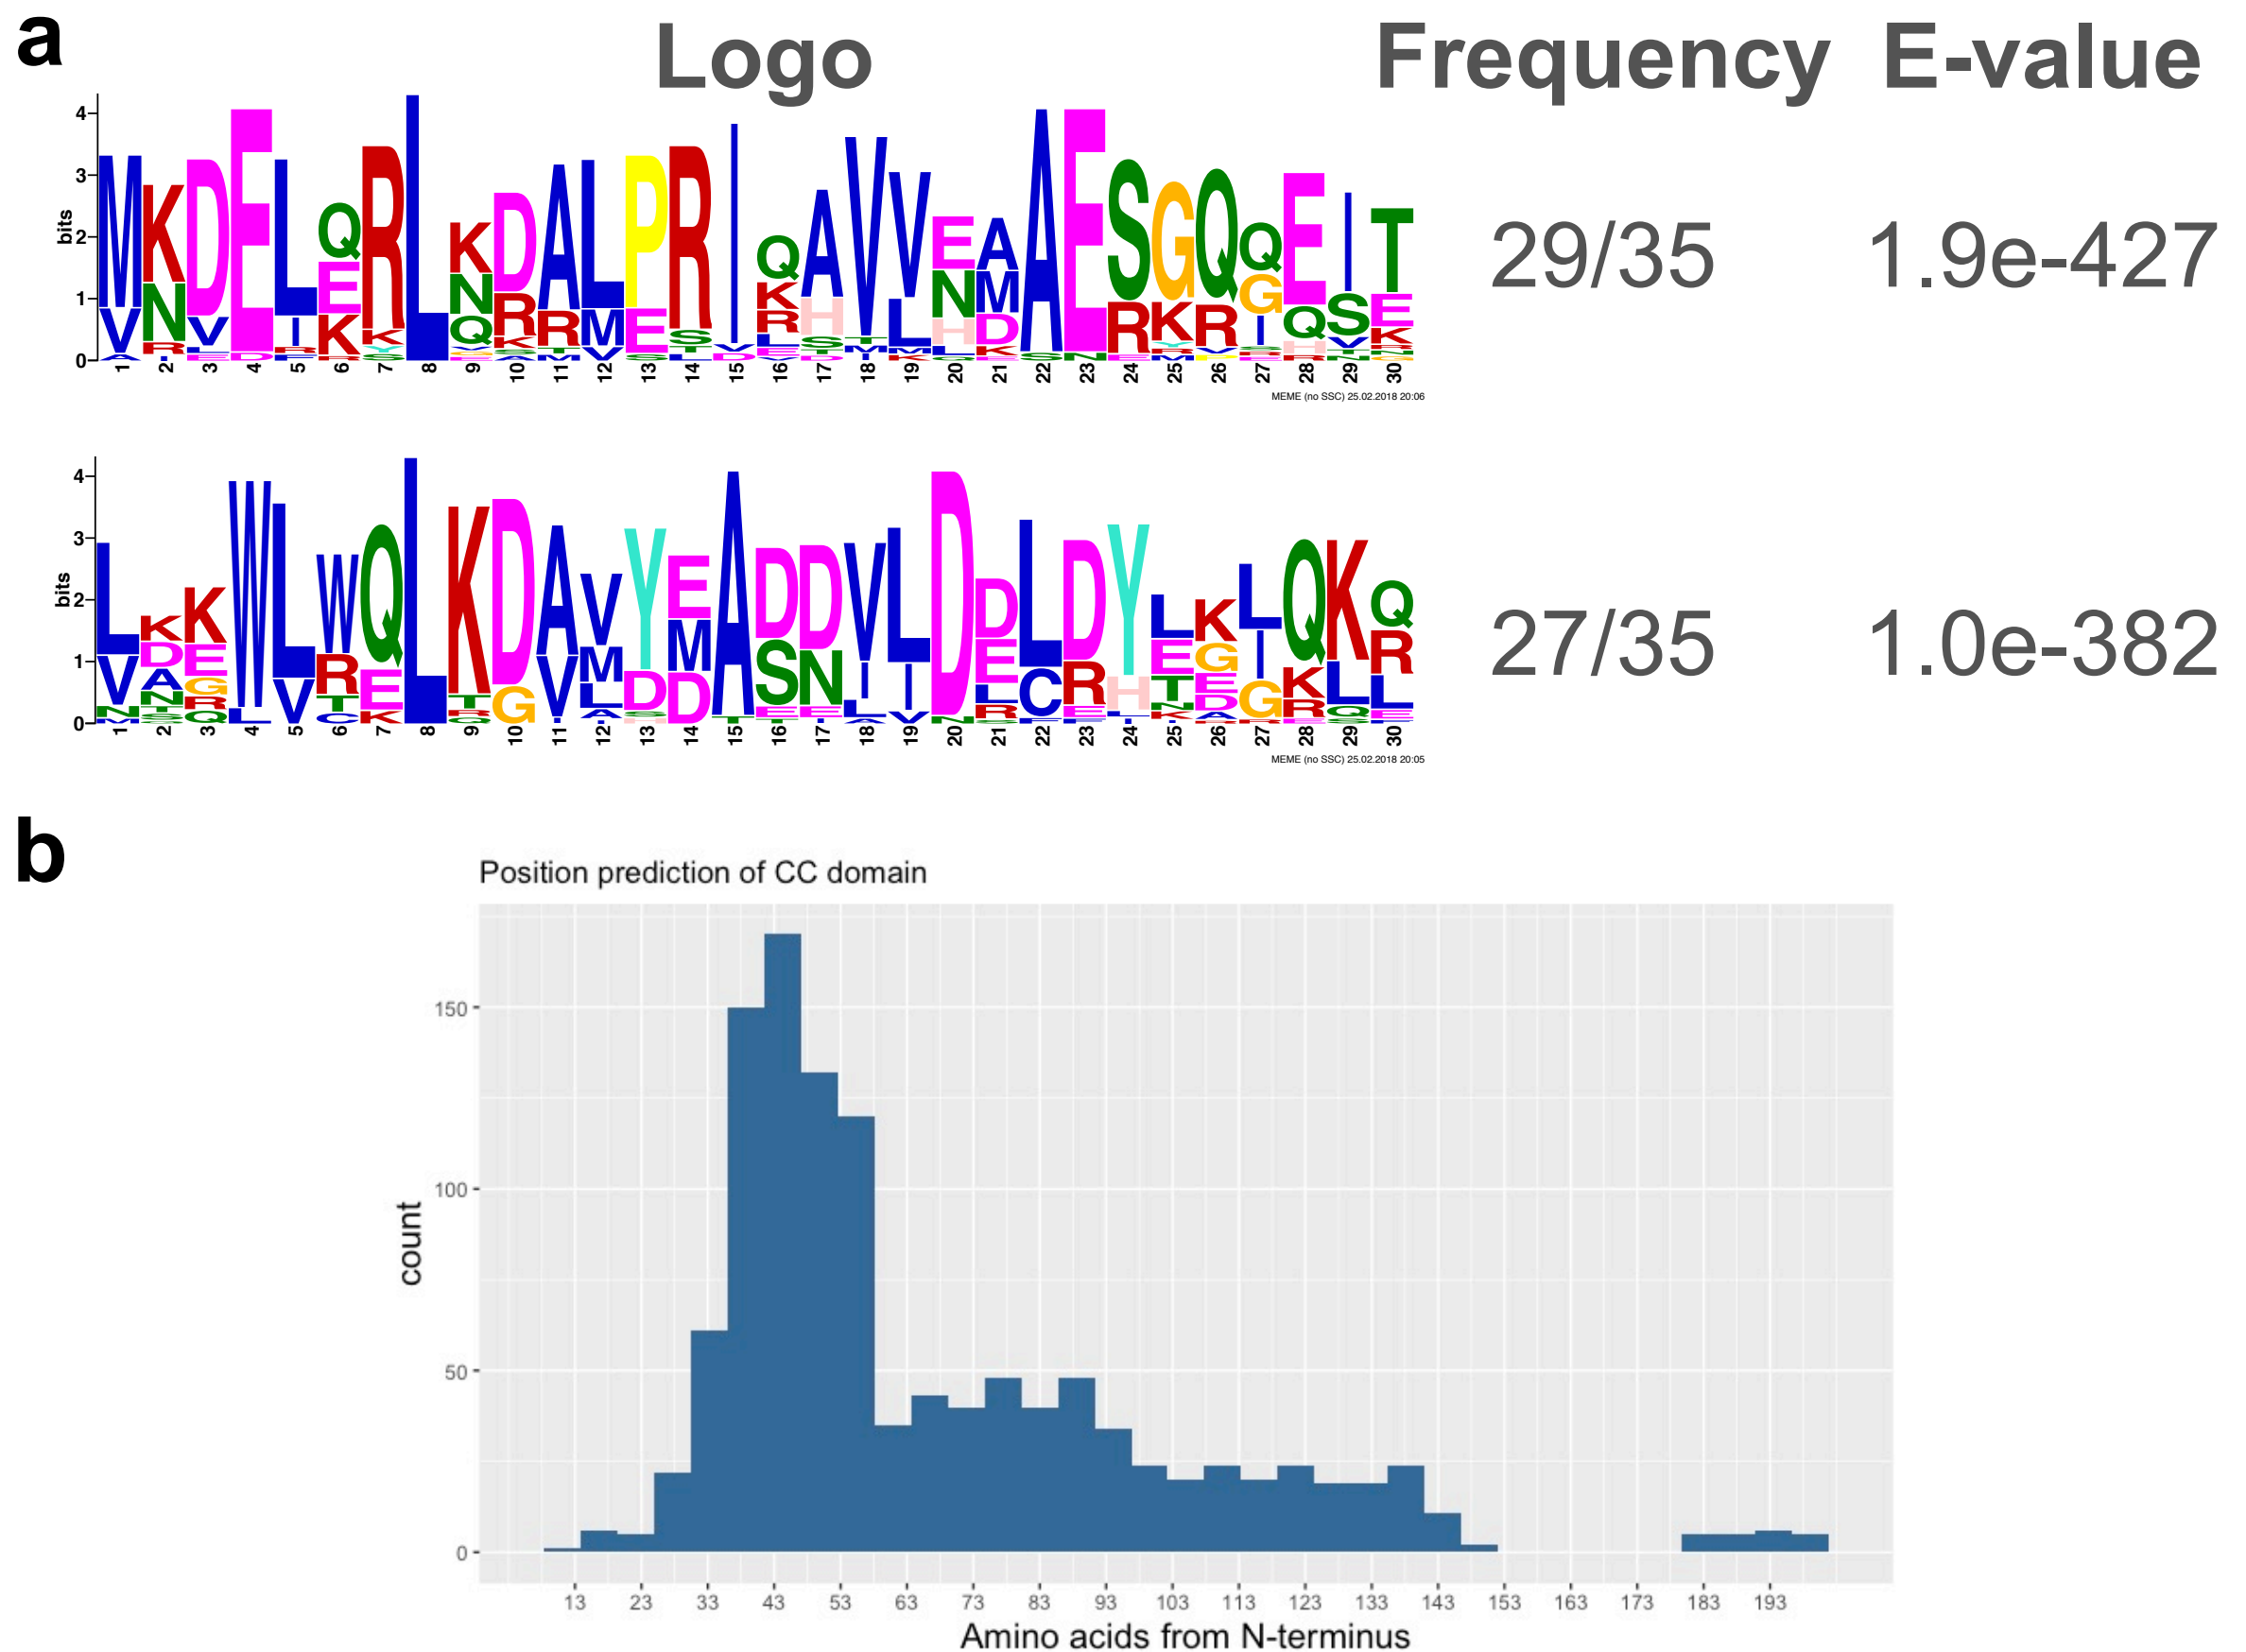

**Figure S1:** Analysis of the N- terminal domain in non-TNL sequences. **(a)** Regular expression of the 30-65 and 65-95 amino acid regions from asparagus sequences. Sequence logo was generated from multiple alignments using MEME suite. **(b)** Amino acid position of predicted CC domain.

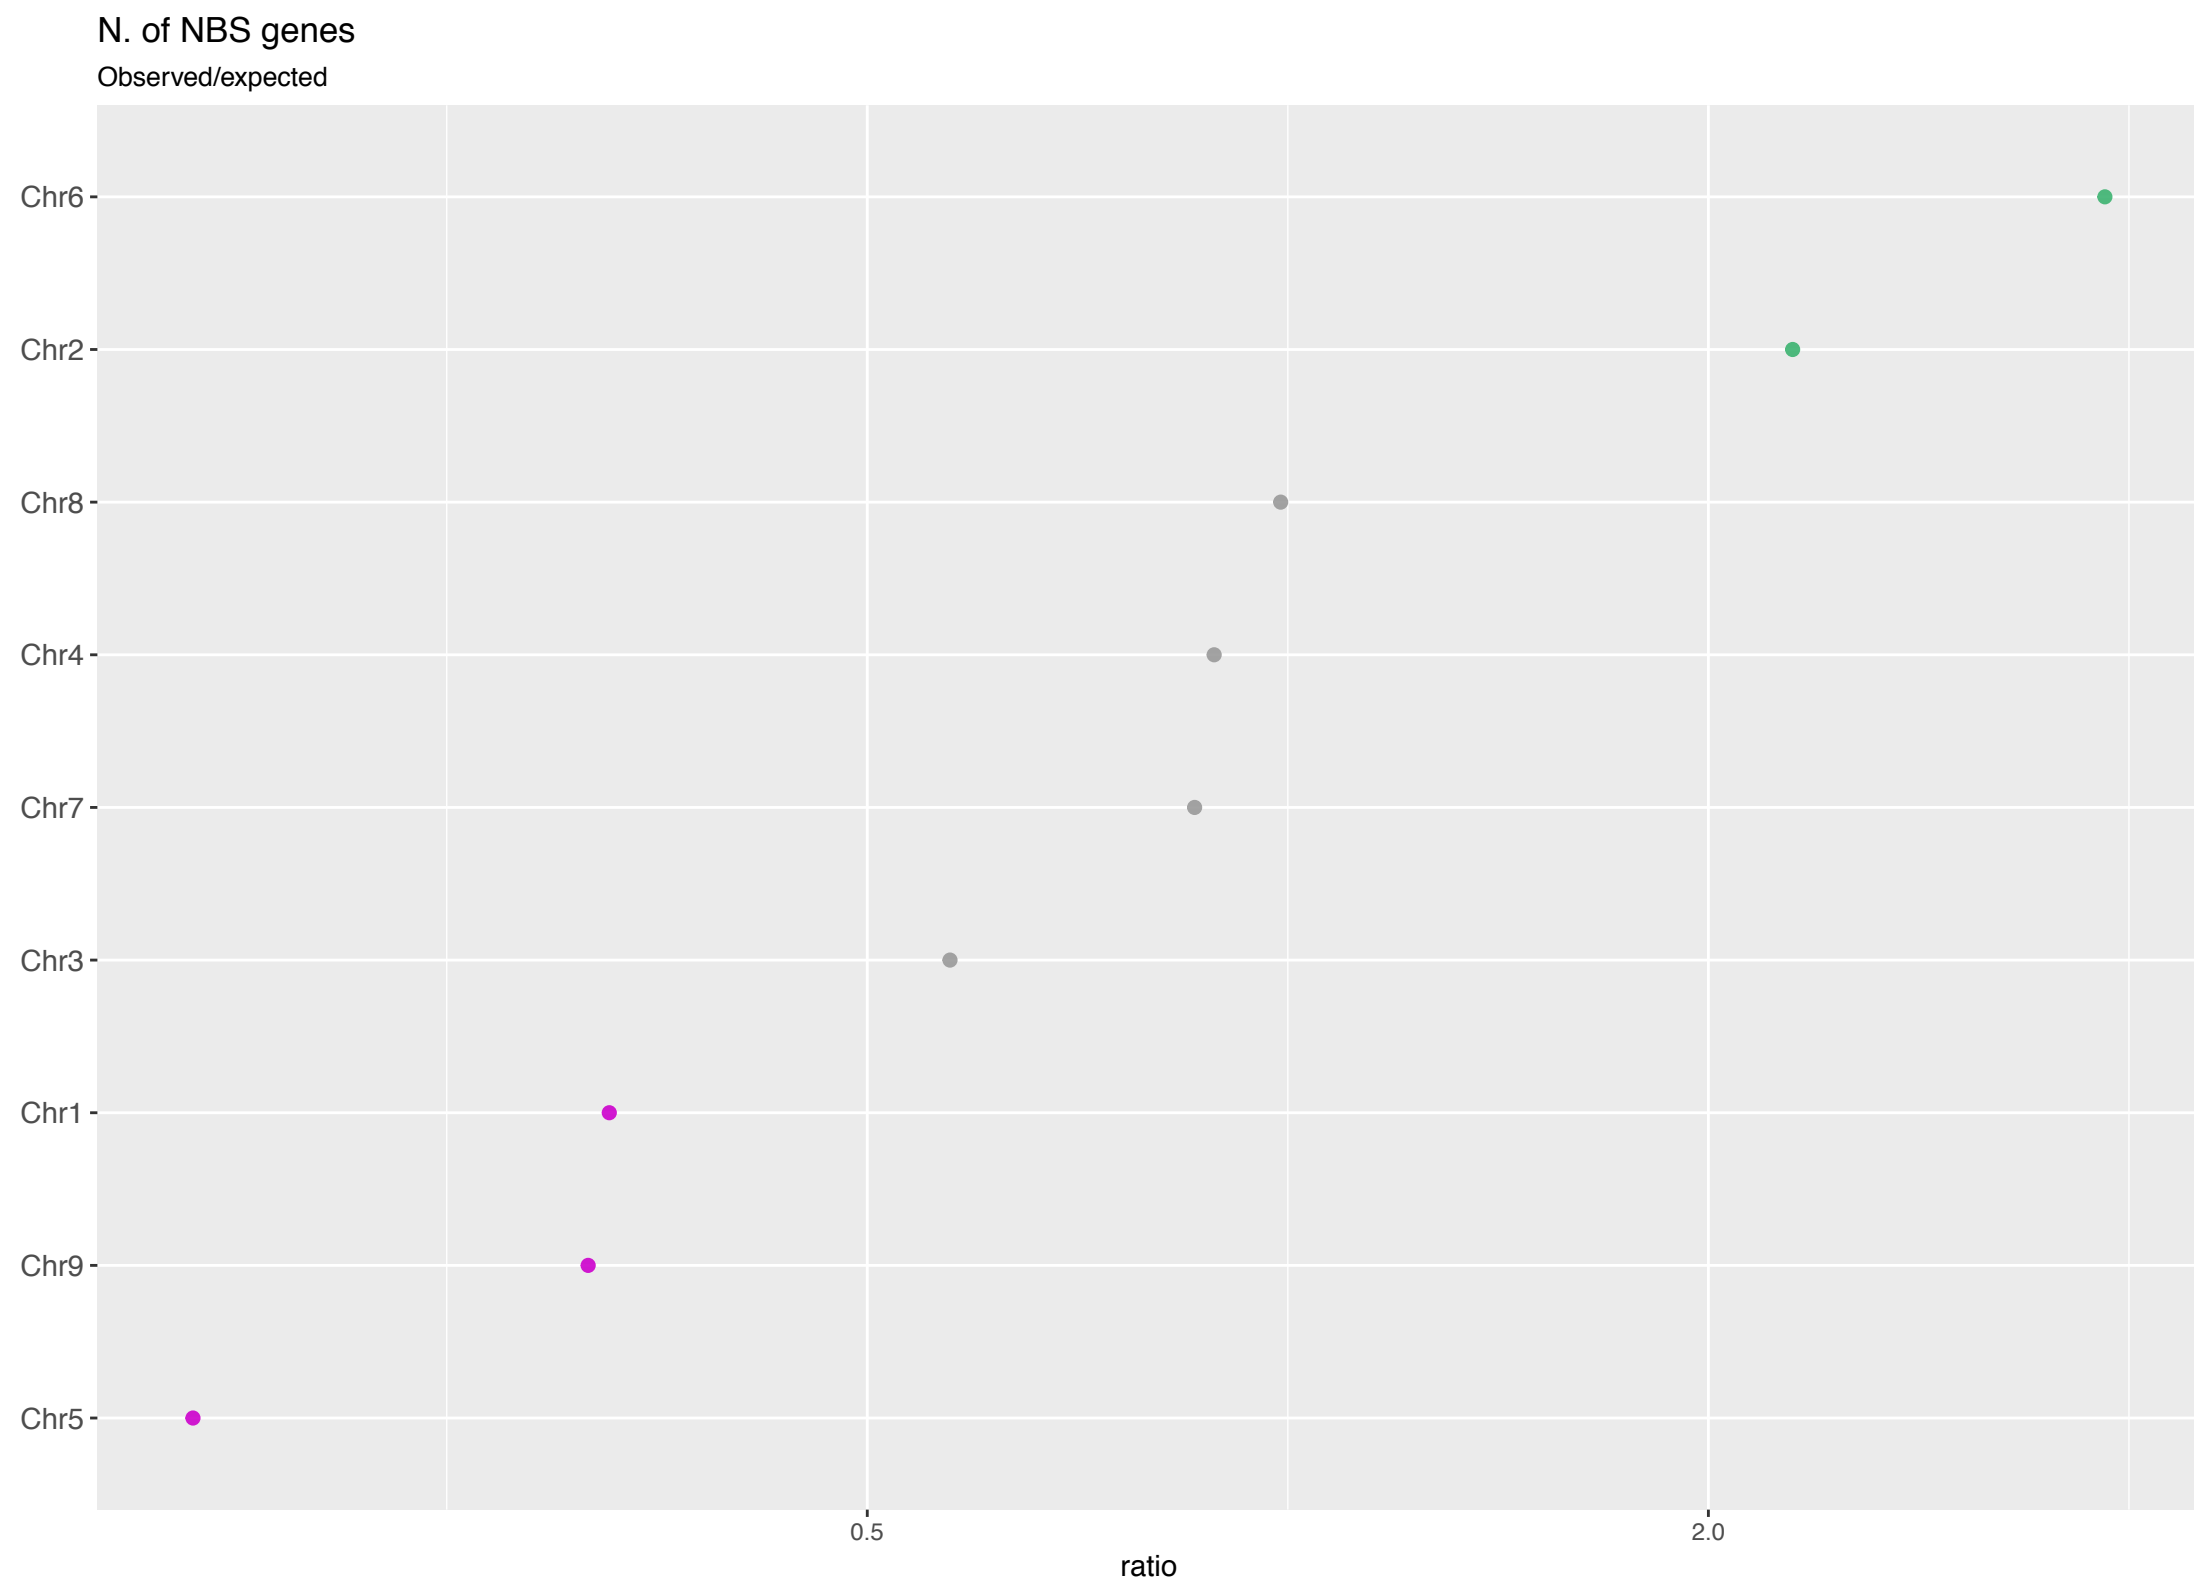

**Figure S2:** Ratio of NBS loci observed vs expected based on uniform distribution according to chromosome length. Green color denotes ratios >2-fold, whereas magenta color denotes ratios < 2-fold.

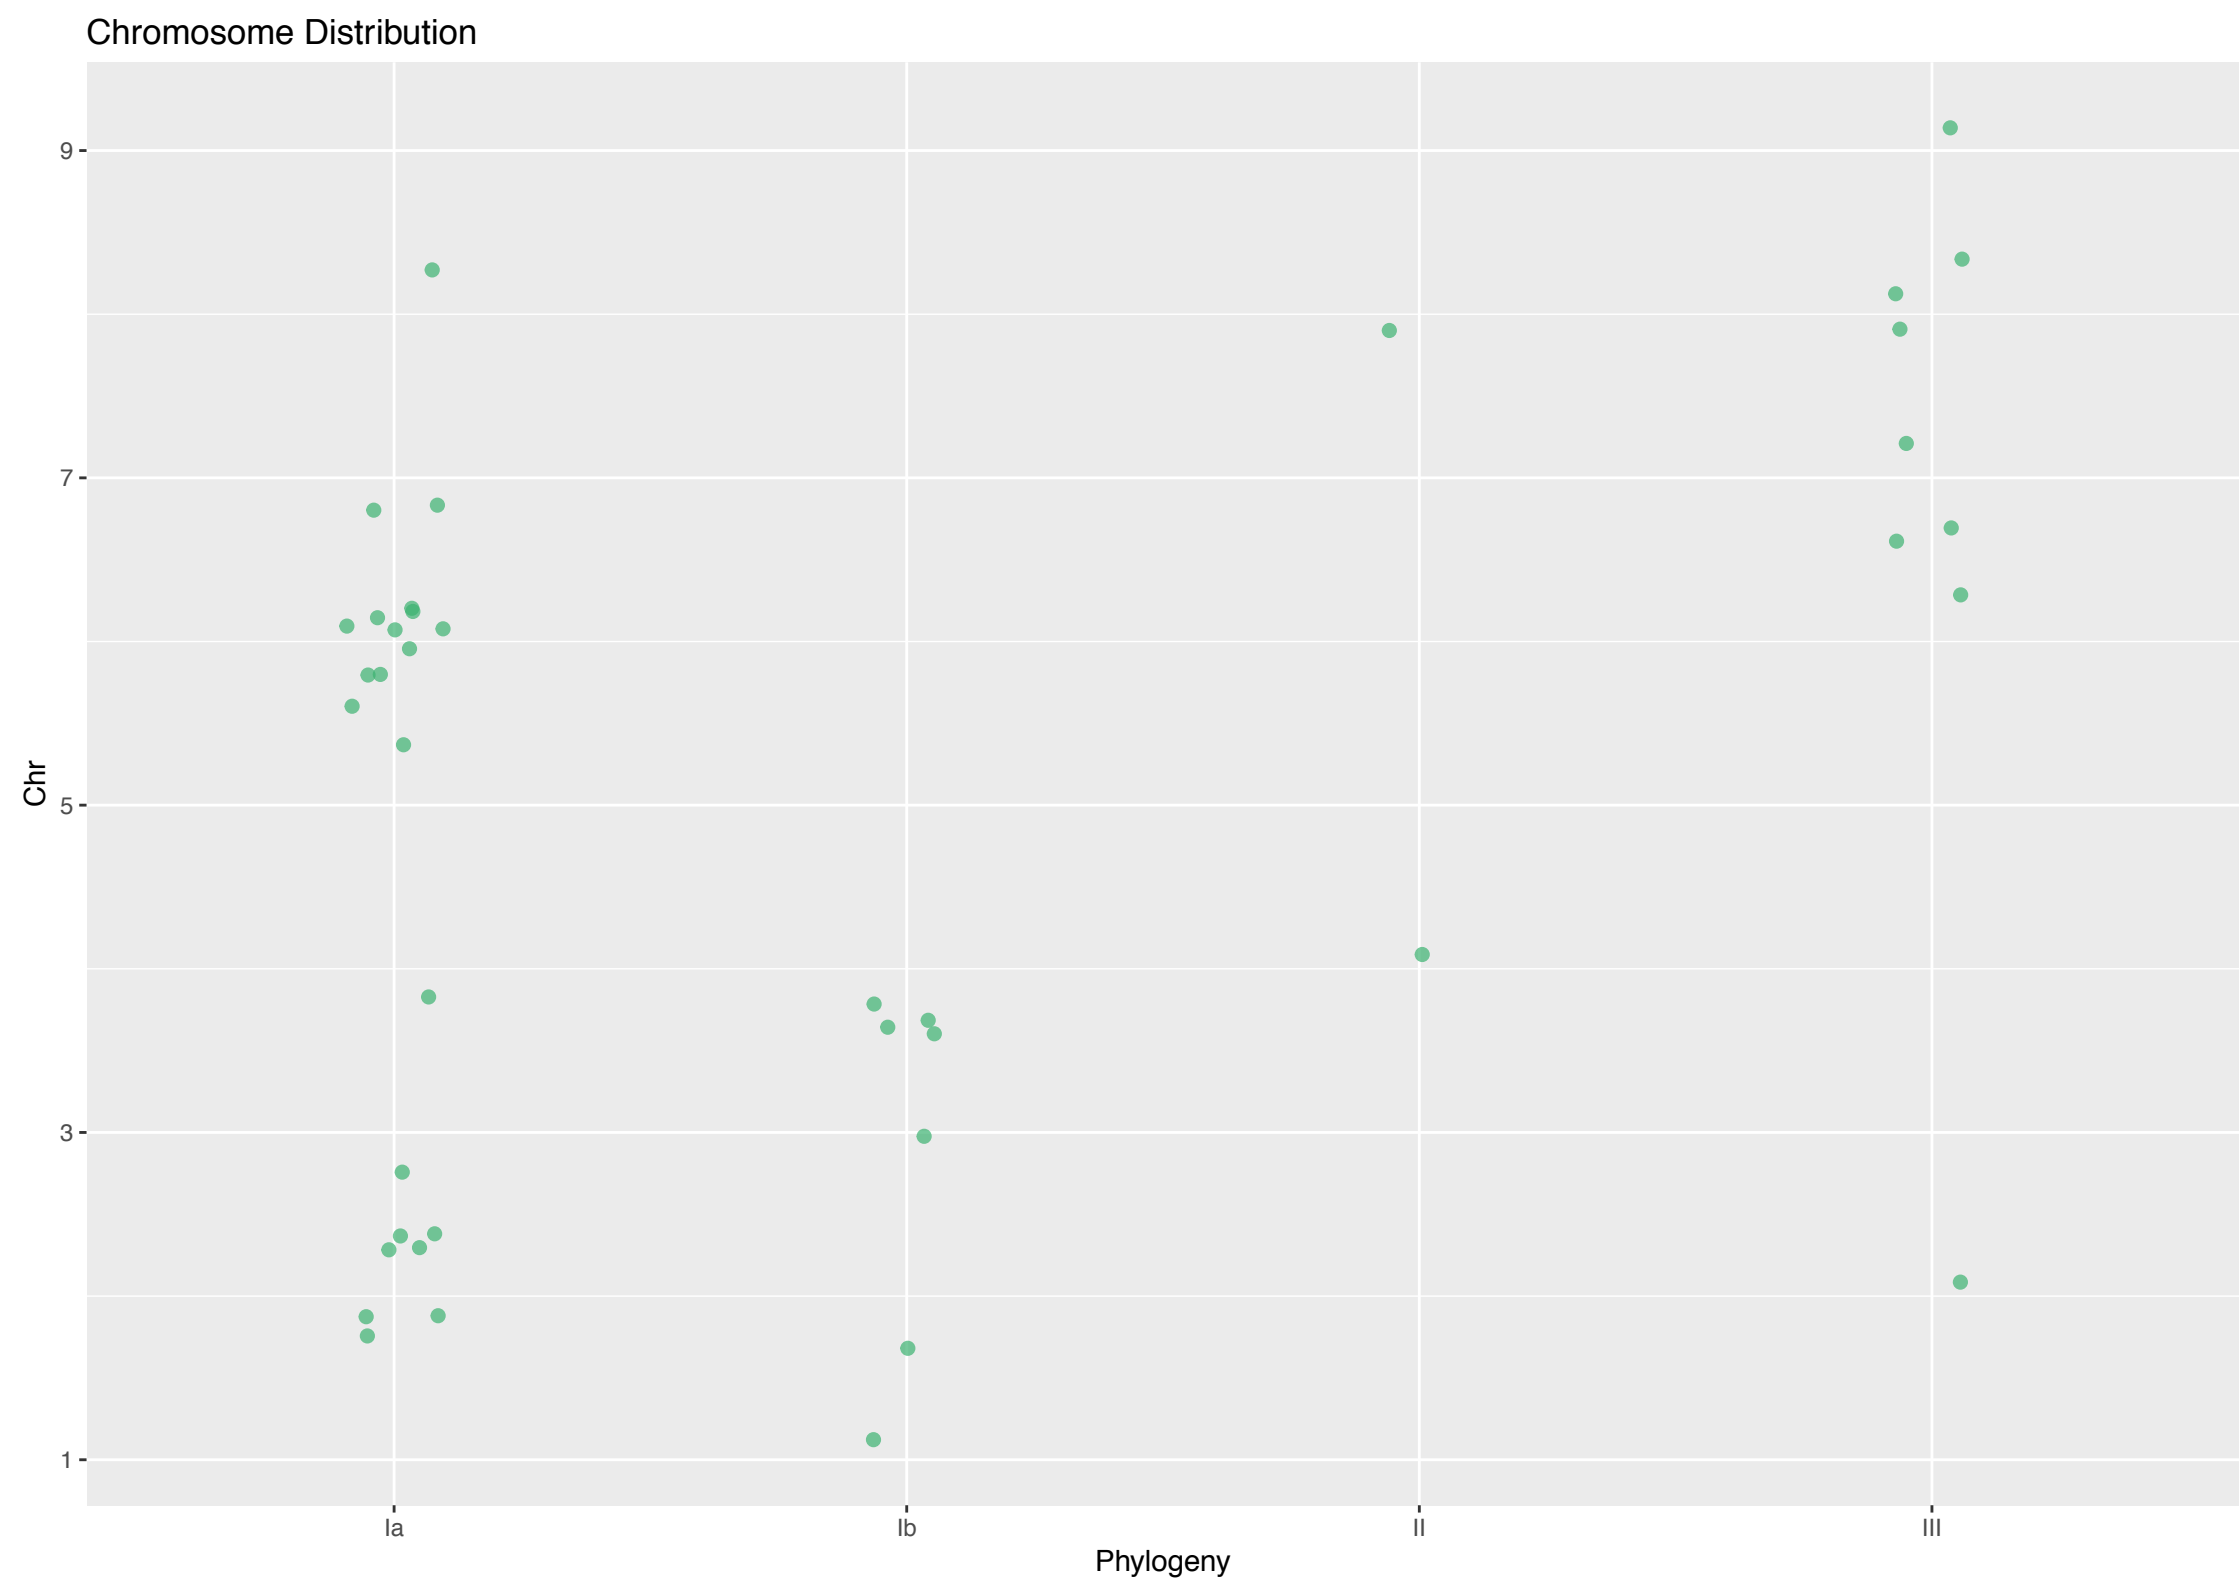

**Figure S3:** Chromosome distribution over phylogenetic clades.

**Table S1.** NBS gene family in *Asparagus officinalis*.

| GeneID  | XP           | LOC          | Chr | chr_start | chr_end   | Strand | AA   | mol_wt     | exon | N.Isof |
|---------|--------------|--------------|-----|-----------|-----------|--------|------|------------|------|--------|
| AoNBS1  | XP_020253886 | LOC109830941 | 1   | 14730963  | 14727608  | -      | 1104 | 124.04     | 2    | 1      |
| AoNBS2  | XP_020266430 | LOC109841914 | 1   | 130763725 | 130767761 | +      | 513  | 58.39      | 4    | 1      |
| AoNBS3  | XP_020253701 | LOC109830750 | 2   | 6302235   | 6294422   | -      | 781  | 88.33      | 4    | 1      |
| AoNBS4  | XP_020253744 | LOC109830788 | 2   | 8745109   | 8742884   | -      | 741  | 85.54      | 1    | 1      |
| AoNBS5  | XP_020254559 | LOC109831614 | 2   | 74222152  | 74218076  | -      | 1210 | 135.77     | 1    | 1      |
| AoNBS6  | XP_020254608 | LOC109831652 | 2   | 76014024  | 76017316  | +      | 1026 | 114.74     | 1    | 1      |
| AoNBS7  | XP_020254254 | LOC109831334 | 2   | 76048314  | 76057593  | +      | 824  | 92.79      | 3    | 1      |
| AoNBS8  | XP_020254638 | LOC109831672 | 2   | 76457854  | 76453803  | -      | 1020 | 114.53     | 1    | 1      |
| AoNBS9  | XP_020254648 | LOC109831678 | 2   | 77071219  | 77066886  | -      | 1241 | 139.55     | 5    | 3      |
| AoNBS10 | XP_020254269 | LOC109831350 | 2   | 77251666  | 77254648  | +      | 738  | 83.68      | 2    | 1      |
| AoNBS11 | XP_020254735 | LOC109831747 | 2   | 79521088  | 79527213  | +      | 1234 | 138.05     | 2    | 5      |
| AoNBS12 | XP_020255460 | LOC109832521 | 3   | 4171316   | 4164677   | -      | 1456 | 164.28     | 7    | 1      |
| AoNBS13 | XP_020256584 | LOC109833349 | 3   | 21850872  | 21870961  | +      | 851  | 84.18      | 4    | 1      |
| AoNBS14 | XP_020256581 | LOC109833347 | 3   | 21874390  | 21884220  | +      | 1195 | 136.2      | 2    | 1      |
| AoNBS15 | XP_020262233 | LOC109838182 | 4   | 11562539  | 11565004  | +      | 822  | 92.16      | 1    | 1      |
| AoNBS16 | XP_020262234 | LOC109838184 | 4   | 11709670  | 11713279  | +      | 1015 | 114.28     | 3    | 1      |
| AoNBS17 | XP_020262239 | LOC109838188 | 4   | 11949671  | 11954877  | +      | 1155 | 129.25     | 1    | 1      |
| AoNBS18 | XP_020260201 | LOC109836641 | 4   | 12319107  | 12313472  | -      | 1022 | 98.48      | 3    | 3      |
| AoNBS19 | XP_020262355 | LOC109838315 | 4   | 20809058  | 20805407  | -      | 1151 | 94.49      | 3    | 1      |
| AoNBS20 | XP_020262401 | LOC109838361 | 4   | 24177560  | 24164226  | -      | 934  | 107.71     | 2    | 1      |
| AoNBS21 | XP_020266254 | LOC109841718 | 5   | 37163549  | 37170184  | +      | 1404 | 159.21     | 5    | 1      |
| AoNBS22 | XP_020270608 | LOC109845747 | 6   | 11824962  | 11828662  | +      | 1110 | 123,443.67 | 3    | 1      |
| AoNBS23 | XP_020270609 | LOC109845748 | 6   | 11853972  | 11854427  | +      | 151  | 16.23      | 1    | 1      |
| AoNBS24 | XP_020270610 | LOC109845749 | 6   | 11874828  | 11885980  | +      | 1232 | 138.52     | 3    | 1      |
| AoNBS25 | XP_020270612 | LOC109845752 | 6   | 11954602  | 11957533  | +      | 913  | 102.84     | 2    | 1      |
| AoNBS26 | XP_020270614 | LOC109845754 | 6   | 11969297  | 11969758  | +      | 153  | 16.5       | 1    | 1      |
| AoNBS27 | XP_020270617 | LOC109845758 | 6   | 12013969  | 12019211  | +      | 1232 | 109.22     | 3    | 1      |
| AoNBS28 | XP_020268733 | LOC109844186 | 6   | 12052053  | 12058625  | +      | 1223 | 137.35     | 4    | 1      |

**Table S1.** NBS gene family in *Asparagus officinalis* (cont.).

|          |              |              |    |           |           |   |      |        |   |   |
|----------|--------------|--------------|----|-----------|-----------|---|------|--------|---|---|
| AoNBS29  | XP_020270619 | LOC109845759 | 6  | 12083300  | 12085923  | + | 689  | 16.26  | 6 | 1 |
| AoNBS30  | XP_020268735 | LOC109844187 | 6  | 12092330  | 12098847  | + | 1172 | 132.47 | 4 | 2 |
| AoNBS31  | XP_020269341 | LOC109844633 | 6  | 13605623  | 13609362  | + | 1114 | 107.38 | 3 | 1 |
| AoNBS32  | XP_020269333 | LOC109844631 | 6  | 13625973  | 13658494  | + | 1243 | 139.42 | 9 | 7 |
| AoNBS33  | XP_020270986 | LOC109846174 | 6  | 51179819  | 51174237  | - | 914  | 102.65 | 4 | 1 |
| AoNBS34  | XP_020269898 | LOC109845106 | 6  | 63032450  | 63033580  | + | 264  | 29.4   | 1 | 1 |
| AoNBS35  | XP_020271110 | LOC109846295 | 6  | 70663507  | 70659375  | - | 1266 | 92.75  | 2 | 1 |
| AoNBS36  | XP_020271621 | LOC109846787 | 7  | 19649375  | 19653388  | + | 1277 | 144.85 | 2 | 1 |
| AoNBS37  | XP_020271898 | LOC109847062 | 7  | 44637125  | 44633251  | - | 1221 | 137.42 | 3 | 1 |
| AoNBS38  | XP_020272777 | LOC109847959 | 7  | 147938534 | 147928209 | - | 624  | 74.22  | 8 | 1 |
| AoNBS39  | XP_020273079 | LOC109848139 | 7  | 149696416 | 149704334 | + | 1093 | 123.39 | 5 | 3 |
| AoNBS40  | XP_020272805 | LOC109847982 | 7  | 149719902 | 149726796 | + | 652  | 73.28  | 2 | 1 |
| AoNBS41  | XP_020272808 | LOC109847984 | 7  | 149748154 | 149766107 | + | 1153 | 130.71 | 5 | 1 |
| AoNBS42  | XP_020244412 | LOC109822593 | 8  | 9494840   | 9499026   | + | 920  | 104.56 | 3 | 3 |
| AoNBS43  | XP_020242652 | LOC109820867 | 8  | 12185110  | 12158006  | - | 929  | 106.78 | 2 | 1 |
| AoNBS44  | XP_020242654 | LOC109820869 | 8  | 12255047  | 12245195  | - | 848  | 95.9   | 3 | 1 |
| AoNBS45  | XP_020244702 | LOC109822852 | 8  | 13009799  | 12993300  | - | 885  | 101.11 | 2 | 1 |
| AoNBS46  | XP_020242295 | LOC109820548 | 8  | 114168900 | 114170503 | + | 388  | 43.14  | 1 | 1 |
| AoNBS47  | XP_020241782 | LOC109820118 | 8  | 125526511 | 125521372 | - | 922  | 104.47 | 3 | 1 |
| AoNBS48  | XP_020245082 | LOC109823207 | 9  | 12177110  | 12174714  | - | 754  | 84.81  | 2 | 1 |
| AoNBS49* | XP_020250123 | LOC109827523 | Un | 0         | 0         | - | 186  | 21.73  | 3 | 1 |

\*AoNBS49 was not mapped on any chromosome.

**Table S2.** Organization in families of NBS genes in four plant genomes.

|                          | Asparagus | <i>B. distachon</i> | Rice  | <i>Arabidopsis</i> |
|--------------------------|-----------|---------------------|-------|--------------------|
| Single-genes             | 19        | 77                  | 216   | 93                 |
| Multi-genes              | 30        | 49                  | 248   | 81                 |
| Gene families            | 5         | 20                  | 93    | 25                 |
| Max. family members      | 19        | 7                   | 10    | 7                  |
| Avg. family members      | 6         | 2.45                | 2.67  | 3.24               |
| Multi-genes/single genes | 1.58      | 0.64                | 1.15  | 0.87               |
| % Multi-gene families    | 61.2%     | 38.9%               | 53.4% | 46.6%              |

Data for *B. distachon*, rice and *Arabidopsis* taken from Tan and Wu Comp. Funct. Genomics 2012, 418208 (2012).

**Table S3.** Organization in families of NBS genes in plant genomes. The stringent criterion coverage and identity of 90% was used for multi-gene family definition.

|                       | <i>Asparagus</i> | <i>F. vesca</i> | <i>M. domestica</i> | <i>P. breschneideri</i> | <i>P. persica</i> | <i>P. mume</i> | <i>C. mollissima</i> |
|-----------------------|------------------|-----------------|---------------------|-------------------------|-------------------|----------------|----------------------|
| Single-genes          | 32               | 128             | 565                 | 298                     | 244               | 270            | 418                  |
| Multi-genes           | 17               | 16              | 183                 | 171                     | 110               | 82             | 101                  |
| Gene families         | 5                | 5               | 62                  | 66                      | 35                | 30             | 41                   |
| Max. family members   | 6                | 5               | 9                   | 10                      | 8                 | 7              | 5                    |
| Avg. family members   | 3.4              | 3.20            | 2.95                | 2.59                    | 3.14              | 2.73           | 2.46                 |
| % Multi-gene families | 34.69            | 11.11           | 24.47               | 36.46                   | 31.07             | 23.30          | 19.46                |

Data for *F. vesca*, *M. domestica*, *P. breschneideri*, *P. persica* and *P. mume* taken from Yang et al. Mol. Genet. Genomics 280, 187-198 (2008).

Data for *C. mollissima* taken from Zhong et al. Sci Rep.5, 16638 (2015).
